# Supplementary material
Source: publisher figshare collection journal article supplement (https://acs.figshare.com/ndownloader/files/28288328)
Supplement: Supplementary file 1 [file 28288328]

## Supplementary Information

### Cascade Detection of Pyridoxal 5'-Phosphate and Al<sup>3+</sup> Ions Based on Dual-Functionalized Red-Emitting Copper Nanoclusters

Vinita Bhardwaj<sup>a</sup>, Shilpa Bothra<sup>a</sup>, Yachana Upadhyay<sup>b</sup> and Suban K Sahoo<sup>a\*</sup>

<sup>a</sup> Department of Chemistry, Sardar Vallabhbhai National Institute Technology, Surat-395007, Gujarat, India. E-mail: sks@chem.svnit.ac.in; Tel: +91-9723220556.

<sup>b</sup> Department of Chemistry, Malaviya National Institute of Technology, Jaipur-302017, Rajasthan, India.

**Fig. S1.** (a) Vials image of  $\beta$ -CD-GSH-CuNCs with varying amounts of  $\beta$ -CD showing the intensity of fluorescent colour under the UV irradiation at 365 nm. (b) Fluorescence spectral change in  $\beta$ -CD-GSH-CuNCs with different amounts of  $\beta$ -CD.

**Fig. S2.** The emission spectra of  $\beta$ -CD-GSH-CuNCs at different excitation wavelengths.

**Fig. S3.** (a) HR-TEM image of  $\beta$ -CD-GSH-CuNCs and (b) enlarged particles highlighted by circle. (c) Statistical analysis histogram of calculated particles.

**Fig. S4.** FE-SEM image of the isolated solid (inset)  $\beta$ -CD-GSH-CuNCs and the EDX elemental mapping showing the presence of Cu, S, O, N and C elements.

**Fig. S5.** Energy-dispersive X-ray (EDX) spectrum for the elemental characterisation of  $\beta$ -CD-GSH-CuNCs.

**Fig. S6.** Infrared spectra of (i)  $\beta$ -CD, (ii)  $\beta$ -CD-GSH-CuNCs, (iii)  $\beta$ -CD-GSH-CuNCs@PLP and (iv)  $\beta$ -CD-GSH-CuNCs@PLP in presence of Al<sup>3+</sup>.

**Fig. S7.** The Benesi-Hildebrand plot of PLP with  $\beta$ -CD-GSH-CuNCs for calculating binding constant.

**Fig. S8.** Emission spectra of  $\beta$ -CD-GSH-CuNCs@PLP in presence of various metal ions.

**Fig. S9.** Fluorescence emission spectra of  $\beta$ -CD-GSH-CuNCs,  $\beta$ -CD-GSH-CuNCs@PLP,  $\beta$ -CD-GSH-CuNCs + Al<sup>3+</sup> without PLP and  $\beta$ -CD-GSH-CuNCs@PLP with Al<sup>3+</sup>.

**Fig. S10.** (a) Emission and (b) UV-Vis spectral changes of  $\beta$ -CD/PLP inclusion complex after addition of Al<sup>3+</sup> ( $1.76 \times 10^{-5}$  M).

**Fig. S11.** DLS results of  $\beta$ -CD-GSH-CuNCs@PLP in the absence (a) and presence of Al<sup>3+</sup> (b).

**Fig. S12.** UV-Vis spectrum of  $\beta$ -CD-GSH-CuNC,  $\beta$ -CD-GSH-CuNCs@PLP and  $\beta$ -CD-GSH-CuNCs@PLP with Al<sup>3+</sup>.

**Fig. S13.** Bar graph shows Al<sup>3+</sup> ion detection in the presence of various interfering metal ions.

**Fig. S14.** CIE 1931 chromaticity diagram showing point (A) the colour coordinates of  $\beta$ -CD-GSH-CuNCs, point (B) the colour coordinates when the PLP concentration was  $2 \times 10^{-4}$  M, and point (C) the colour coordinates when the Al<sup>3+</sup> ( $2.4 \times 10^{-6}$  M) was added to *in situ* generated  $\beta$ -CD-GSH-CuNCs@PLP.

**Table S1.** Summary of other recently published nanosensors for the detection of Al<sup>3+</sup> ions.

**Contains 13 pages:** 14 Supporting Figures, and 1 supporting Table.

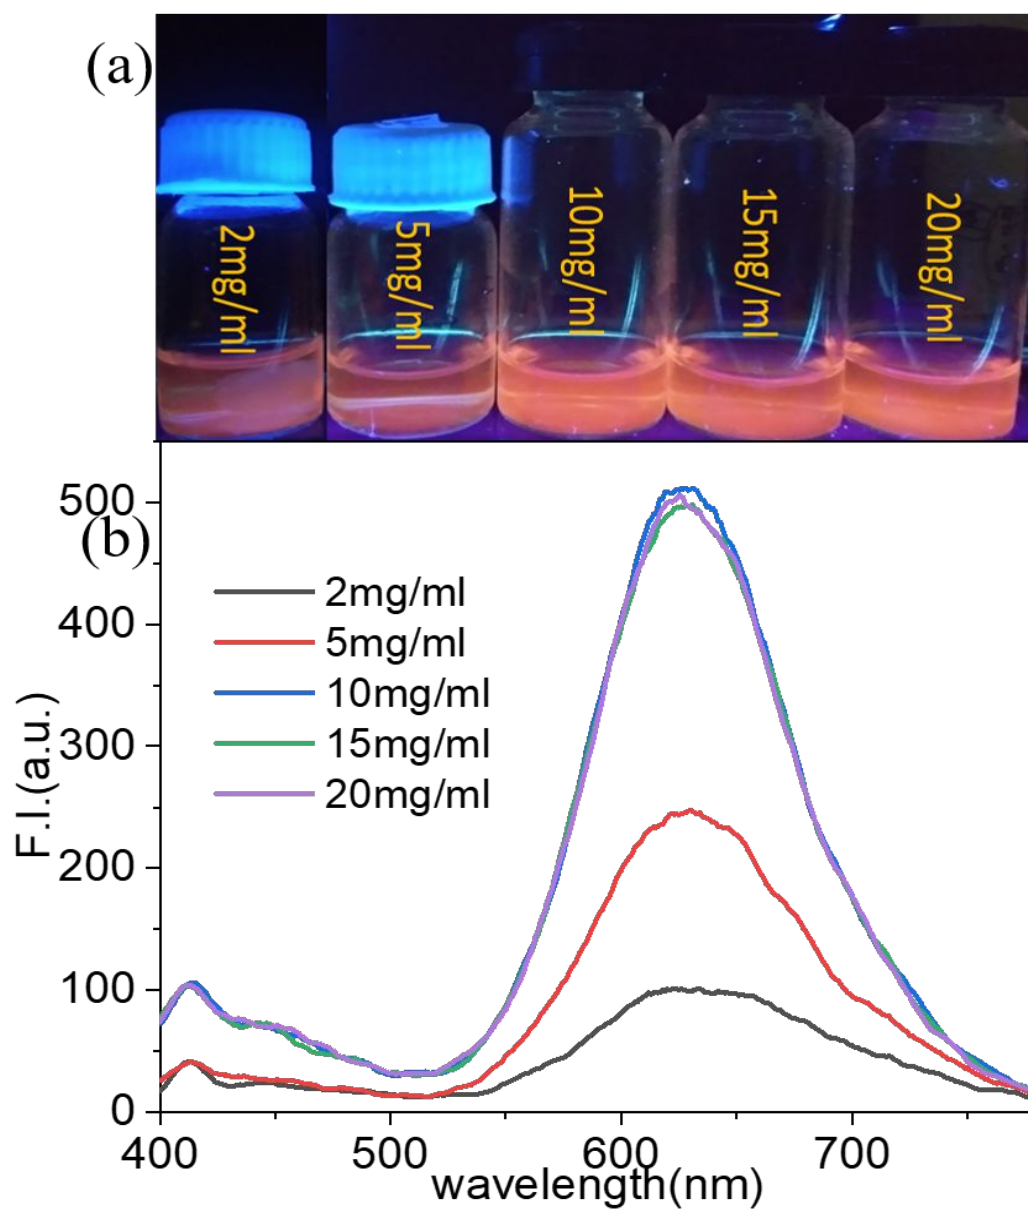

**Fig. S1.** (a) Vials image of  $\beta$ -CD-GSH-CuNCs with varying amounts of  $\beta$ -CD showing the intensity of fluorescent colour under the UV irradiation at 365 nm. (b) Fluorescence spectral change in  $\beta$ -CD-GSH-CuNCs with different amounts of  $\beta$ -CD.

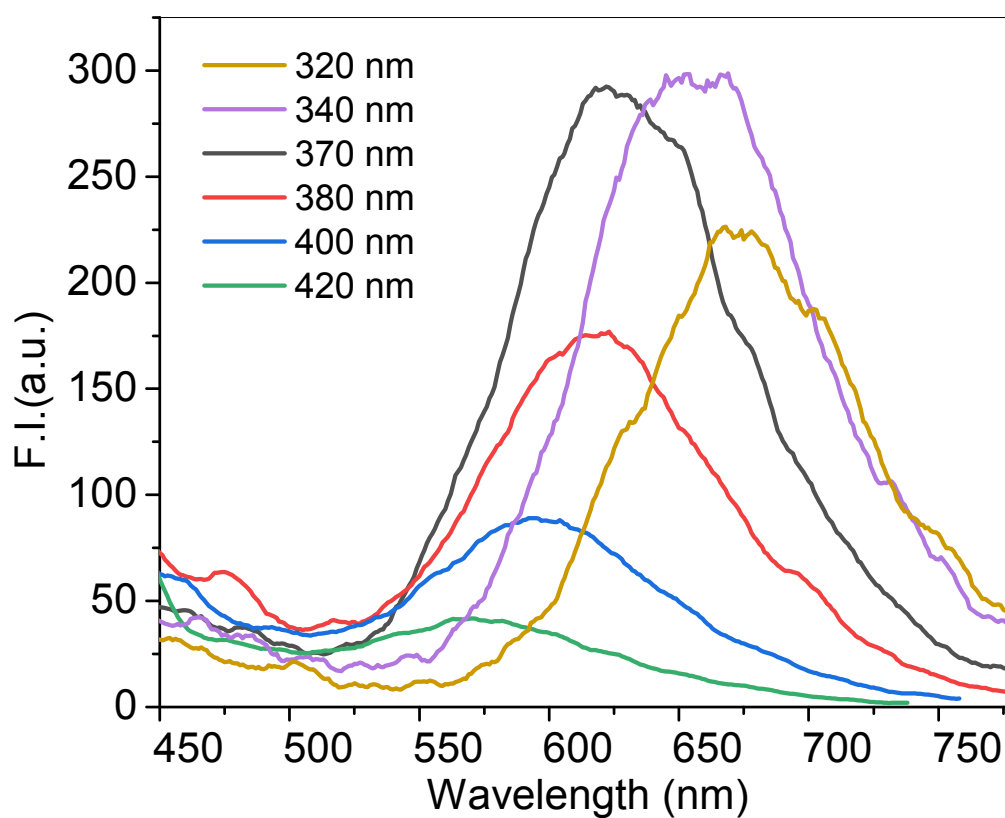

**Fig. S2.** The emission spectra of  $\beta$ -CD-GSH-CuNCs at different excitation wavelengths.

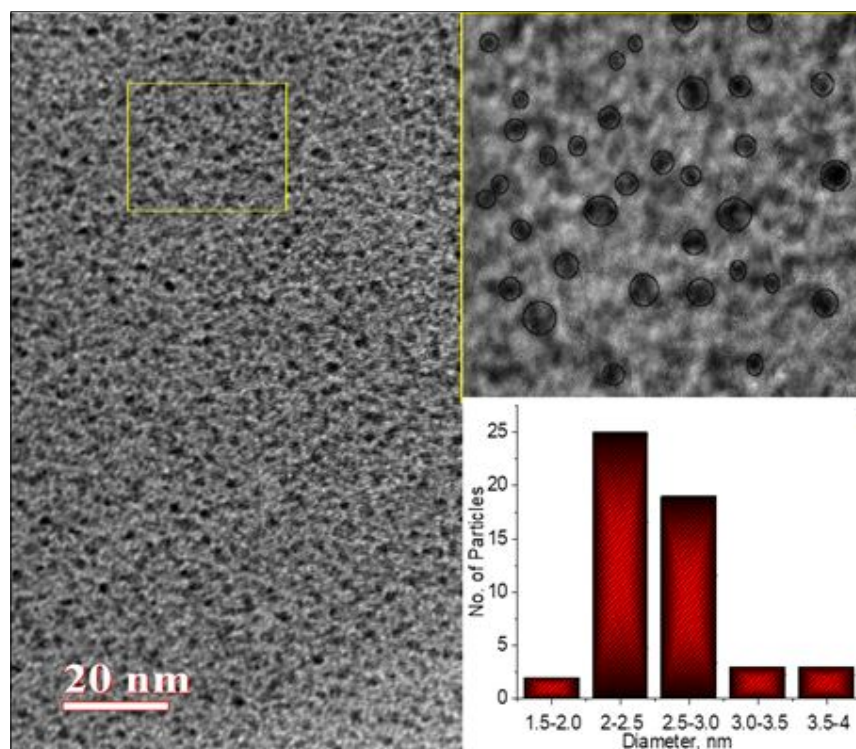

**Fig. S3.** (a) HR-TEM image of  $\beta$ -CD-GSH-CuNCs and (b) enlarged particles highlighted by circle. (c) Statistical analysis histogram of calculated particles.

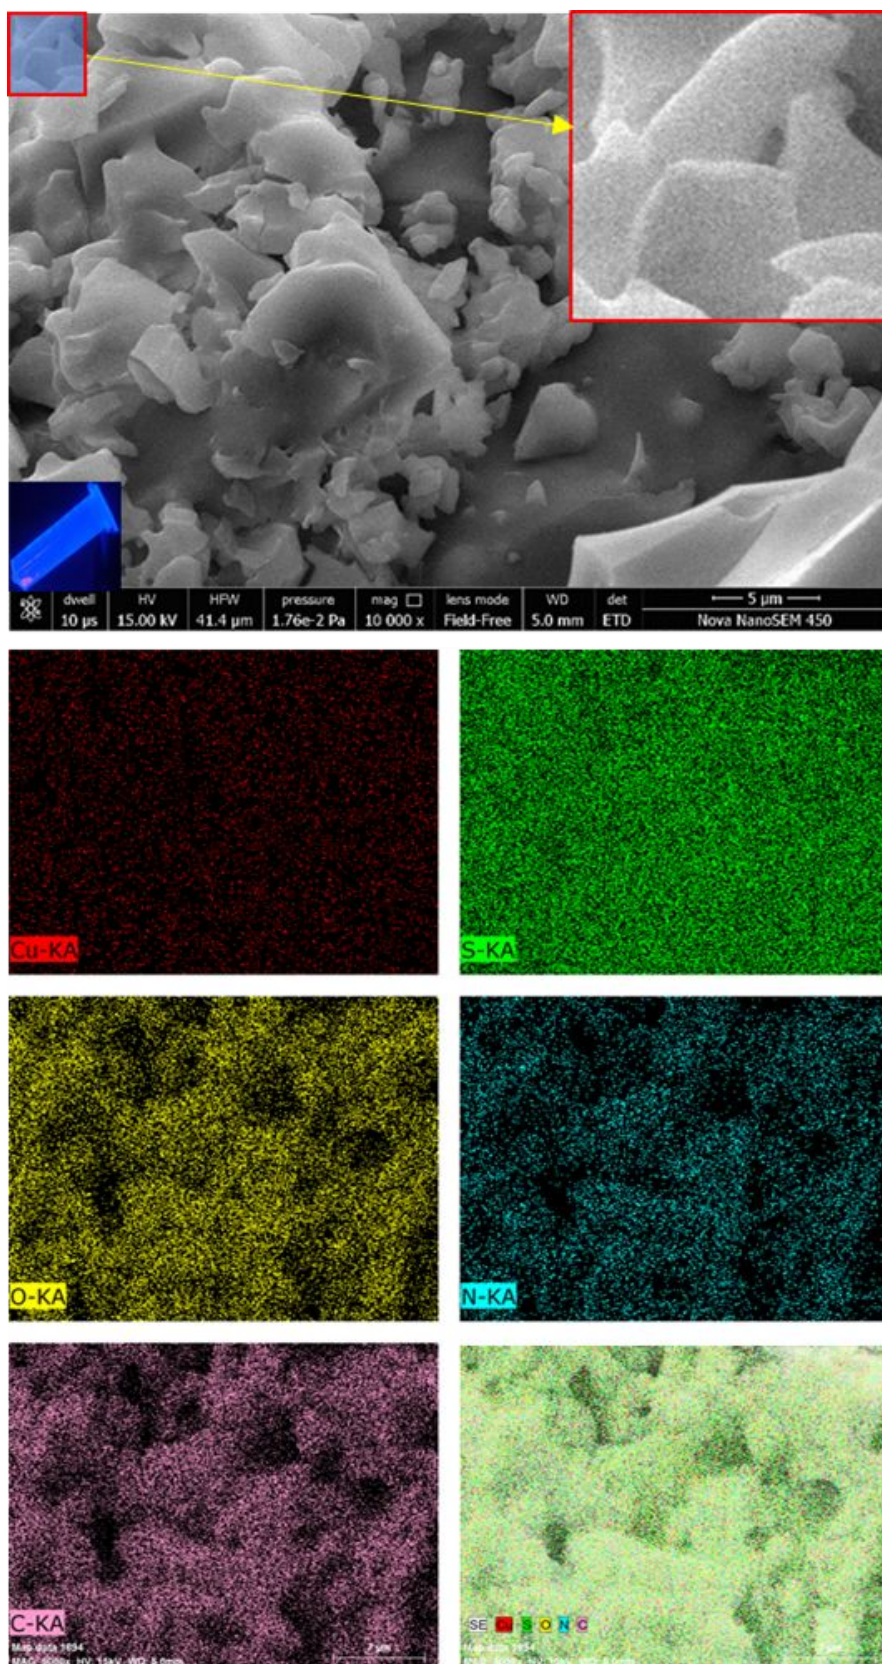

**Fig. S4.** FE-SEM image of the isolated solid (inset)  $\beta$ -CD-GSH-CuNCs and the EDX elemental mapping showing the presence of Cu, S, O, N and C elements.



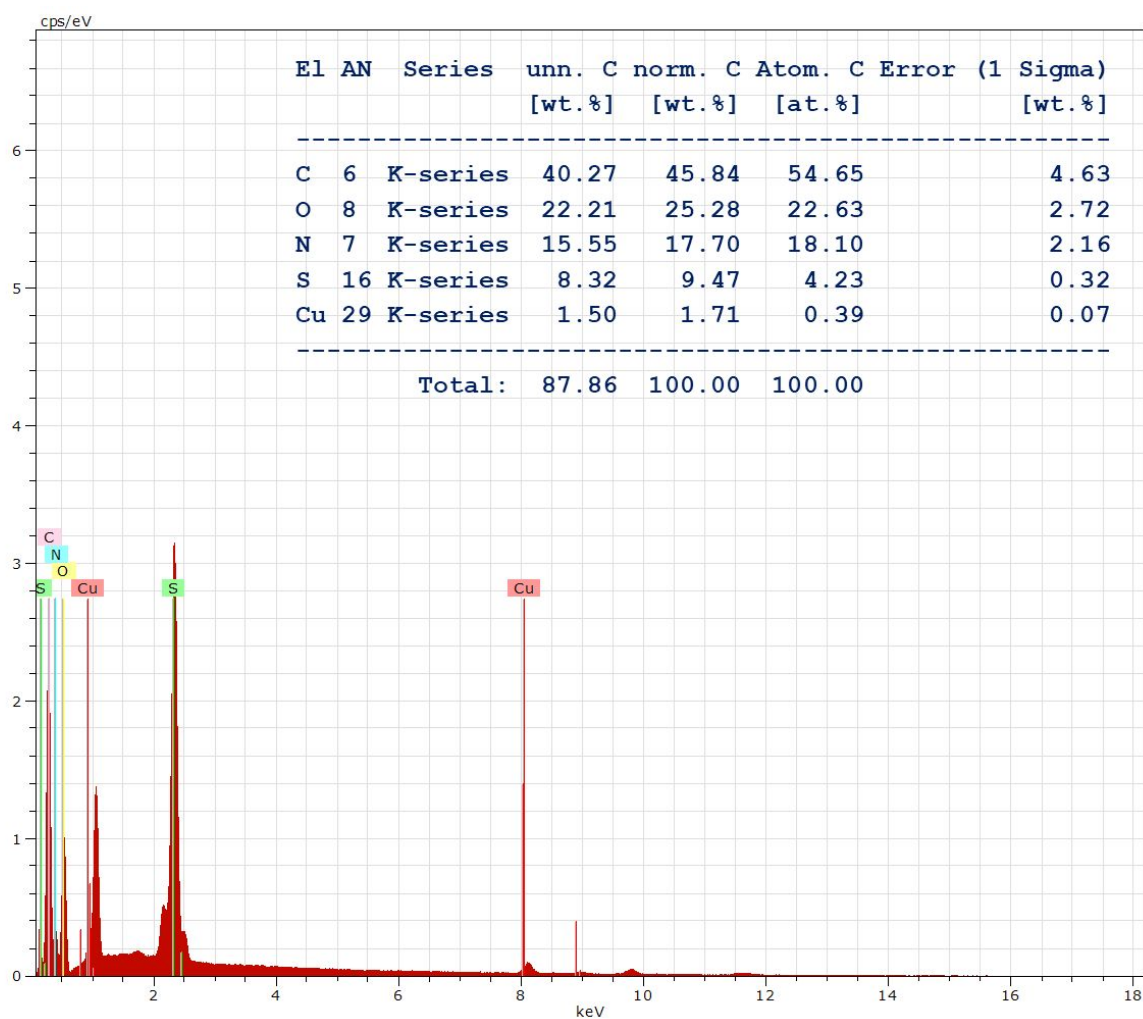

**Fig. S5.** Energy-dispersive X-ray (EDX) spectrum for the elemental characterisation of  $\beta$ -CD-GSH-CuNCs.

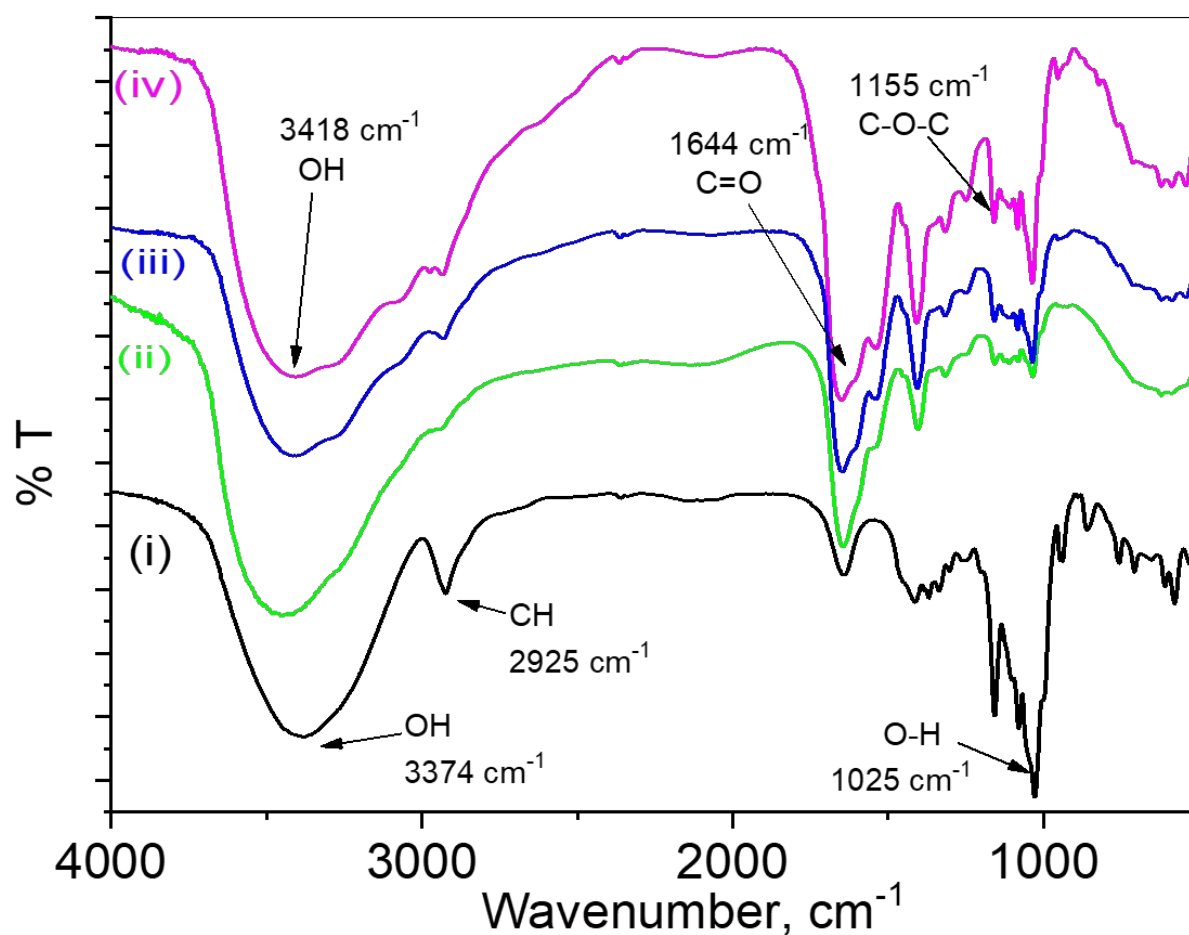

**Fig. S6.** Infrared spectra of (i)  $\beta$ -CD, (ii)  $\beta$ -CD-GSH-CuNCs, (iii)  $\beta$ -CD-GSH-CuNCs@PLP and (iv)  $\beta$ -CD-GSH-CuNCs@PLP in presence of  $\text{Al}^{3+}$ .

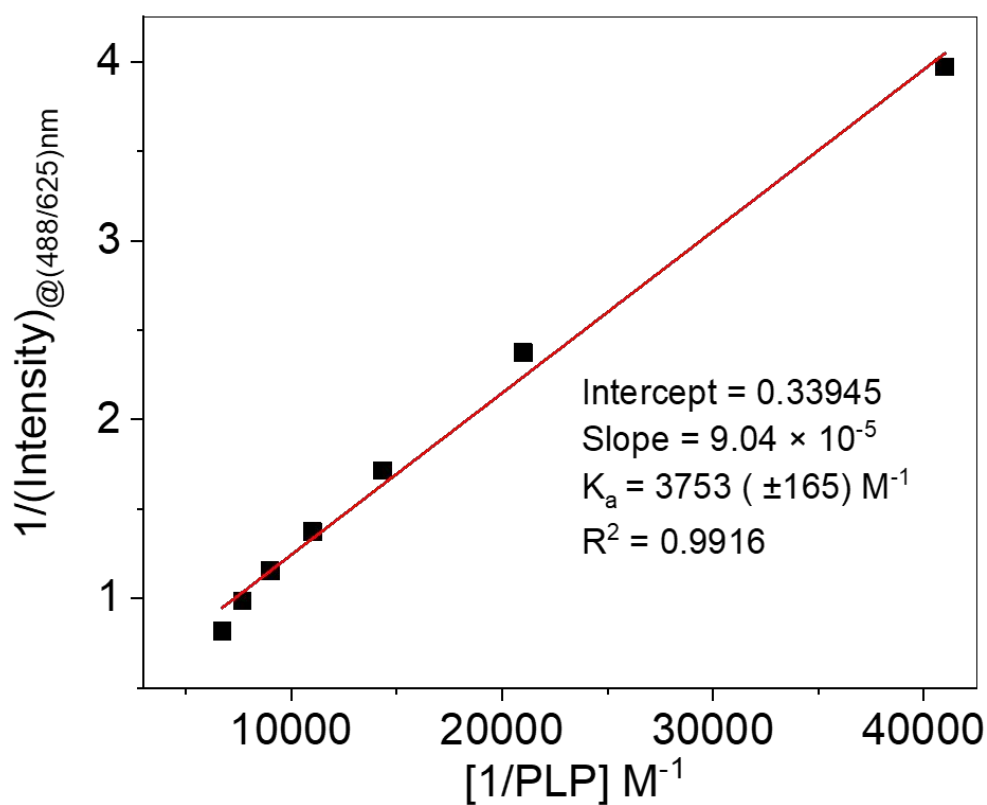

**Fig. S7.** The Benesi-Hildebrand plot of PLP with  $\beta$ -CD-GSH-CuNCs for calculating binding constant.

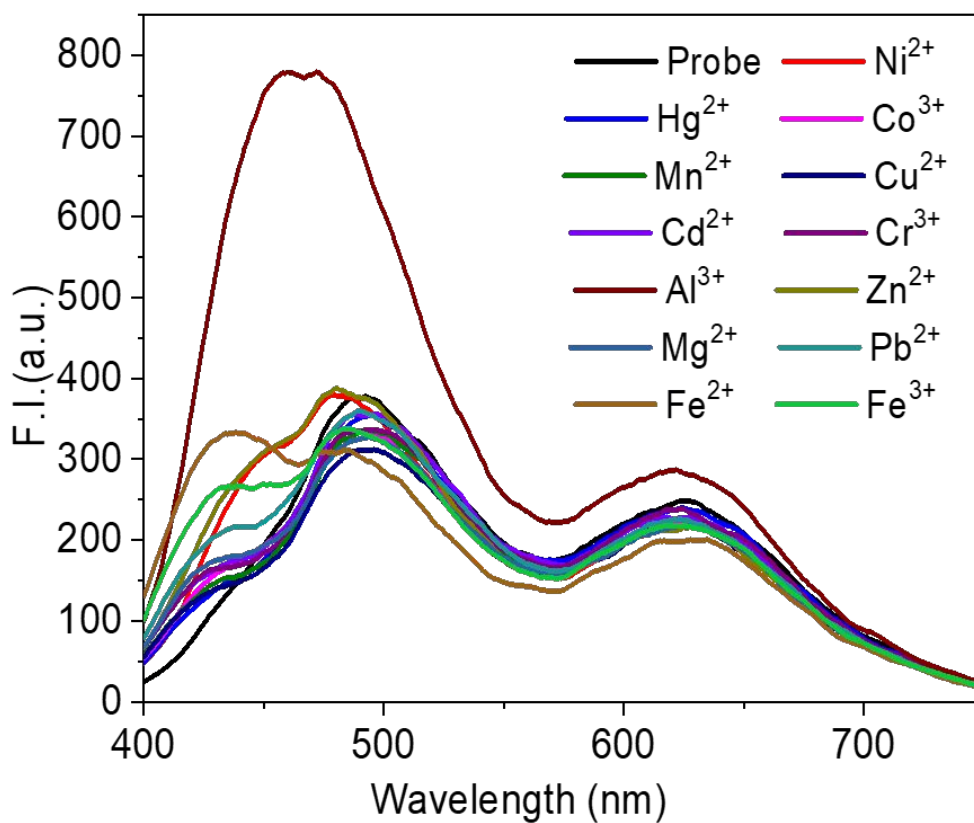

**Fig. S8.** Emission spectra of  $\beta$ -CD-GSH-CuNCs@PLP in presence of various metal ions.

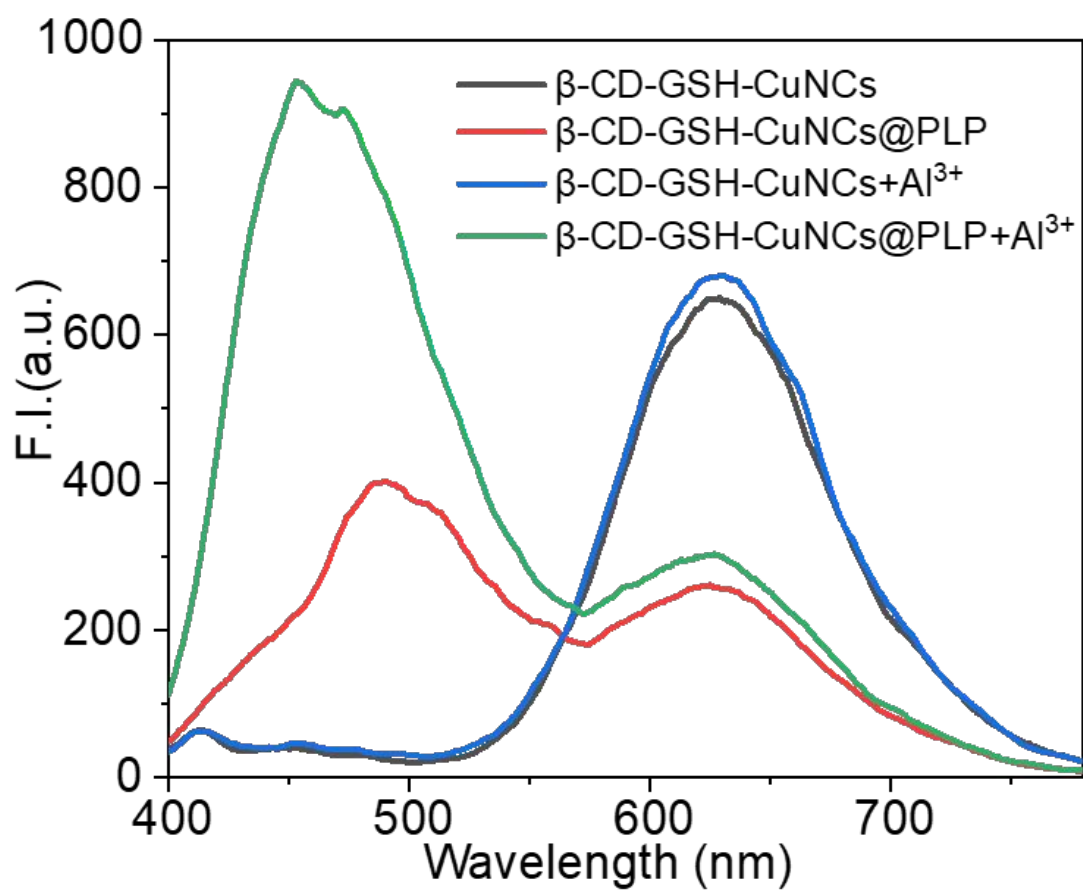

**Fig. S9.** Fluorescence emission spectra of  $\beta$ -CD-GSH-CuNCs,  $\beta$ -CD-GSH-CuNCs@PLP,  $\beta$ -CD-GSH-CuNCs + Al<sup>3+</sup> without PLP and  $\beta$ -CD-GSH-CuNCs@PLP with Al<sup>3+</sup>.



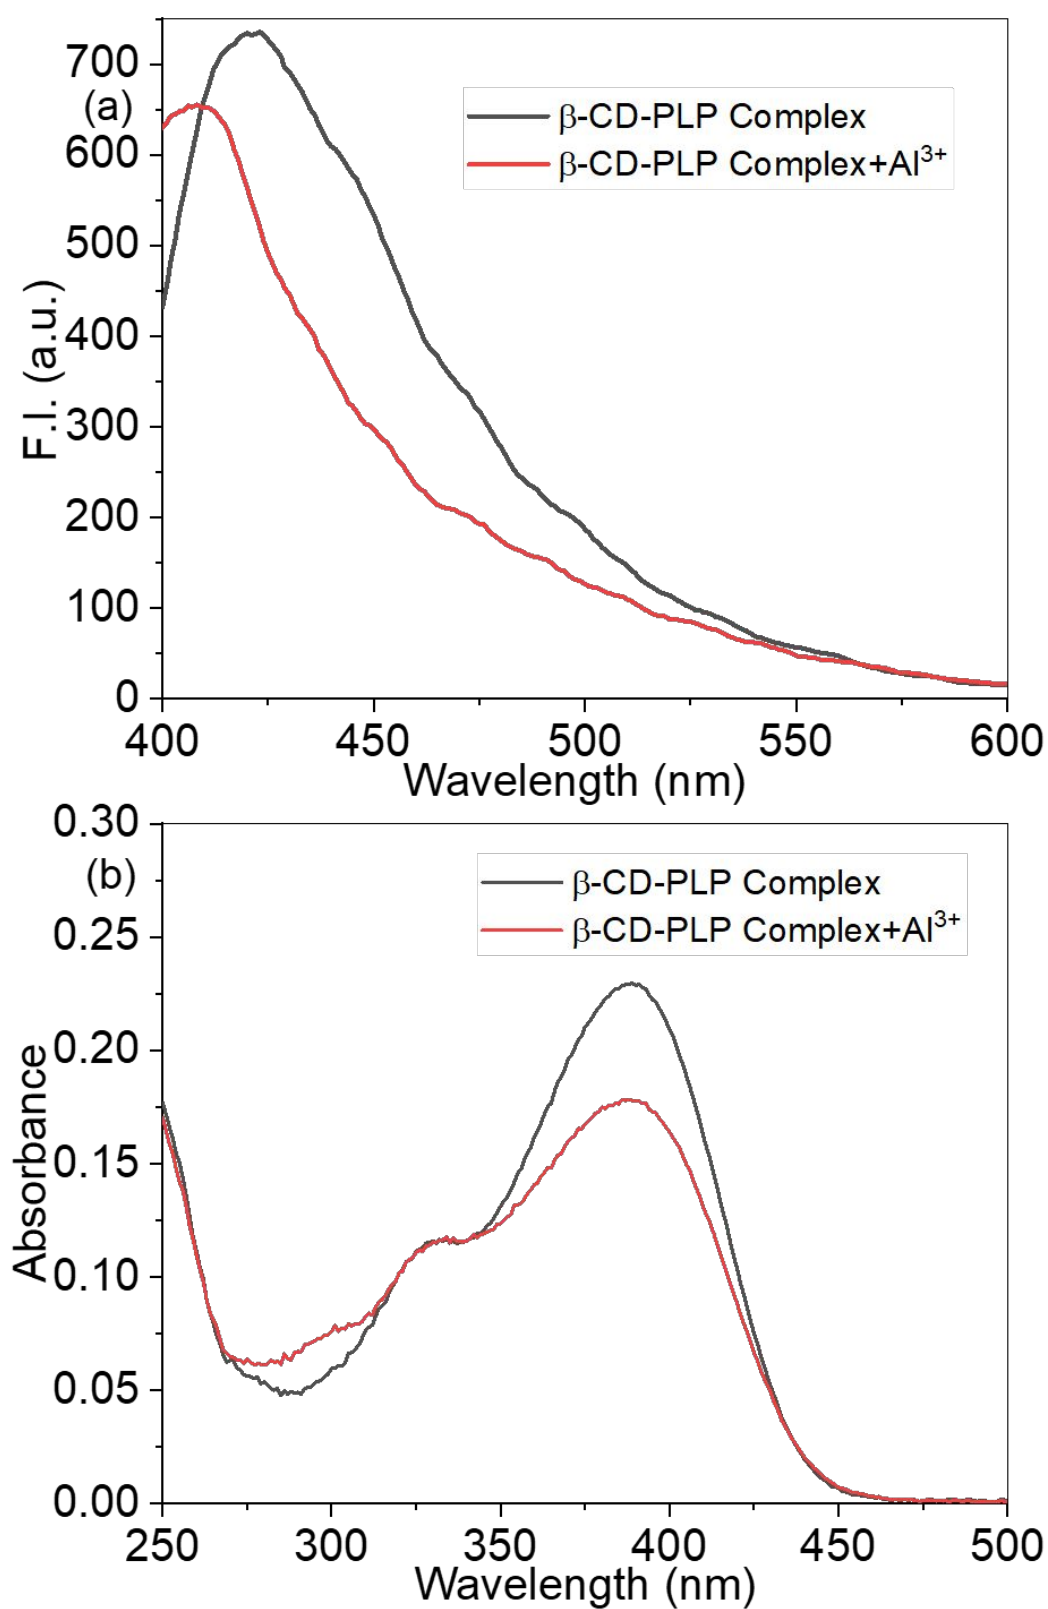

**Fig. S10.** (a) Emission and (b) UV-Vis spectral changes of  $\beta$ -CD/PLP inclusion complex after addition of  $\text{Al}^{3+}$  ( $1.76 \times 10^{-5}$  M).

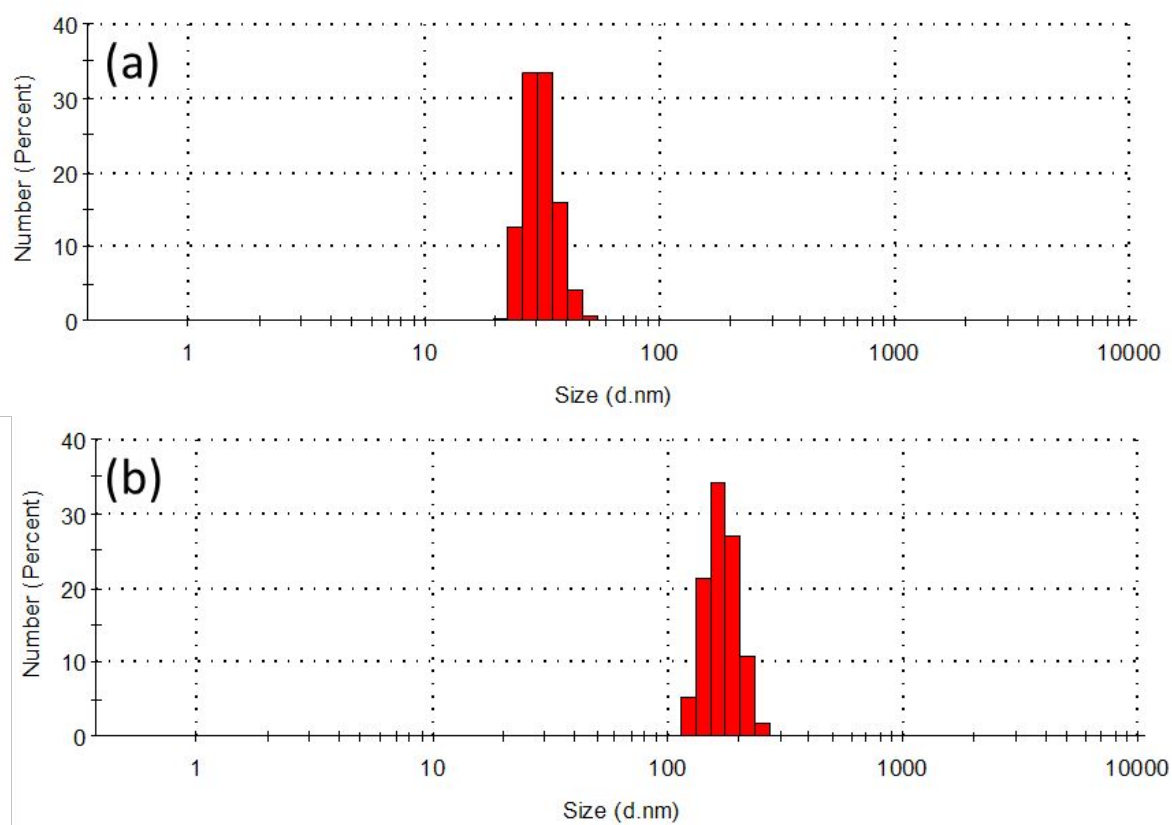

**Fig. S11.** DLS results of  $\beta$ -CD-GSH-CuNCs@PLP in the absence (a) and presence of  $\text{Al}^{3+}$  (b).

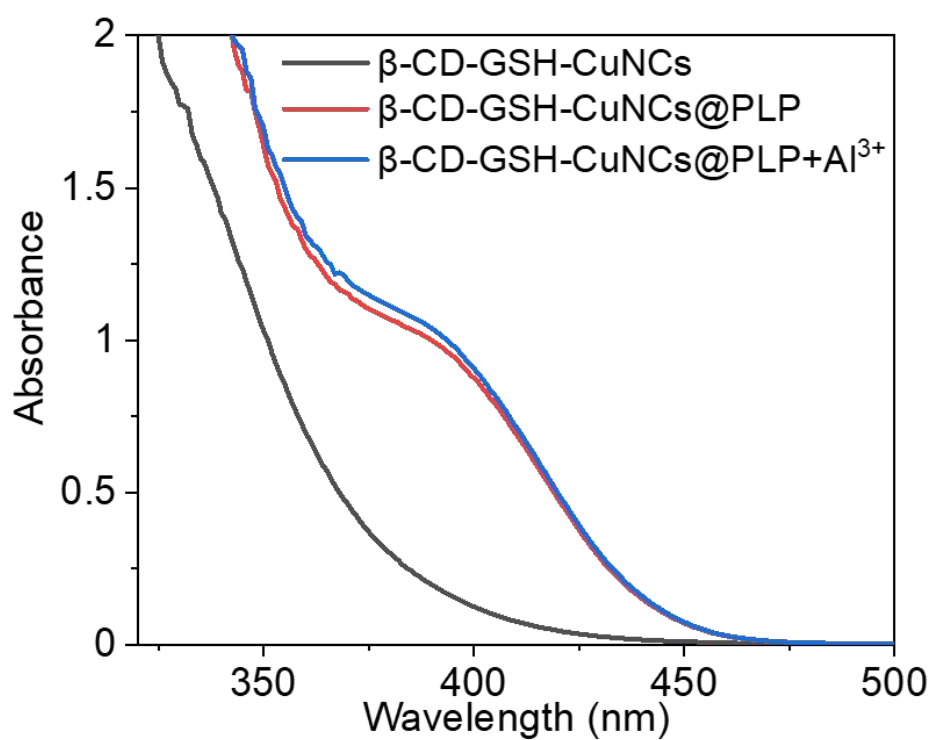

**Fig. S12.** UV-Vis spectrum of  $\beta$ -CD-GSH-CuNC,  $\beta$ -CD-GSH-CuNCs@PLP and  $\beta$ -CD-GSH-CuNCs@PLP with  $\text{Al}^{3+}$ .

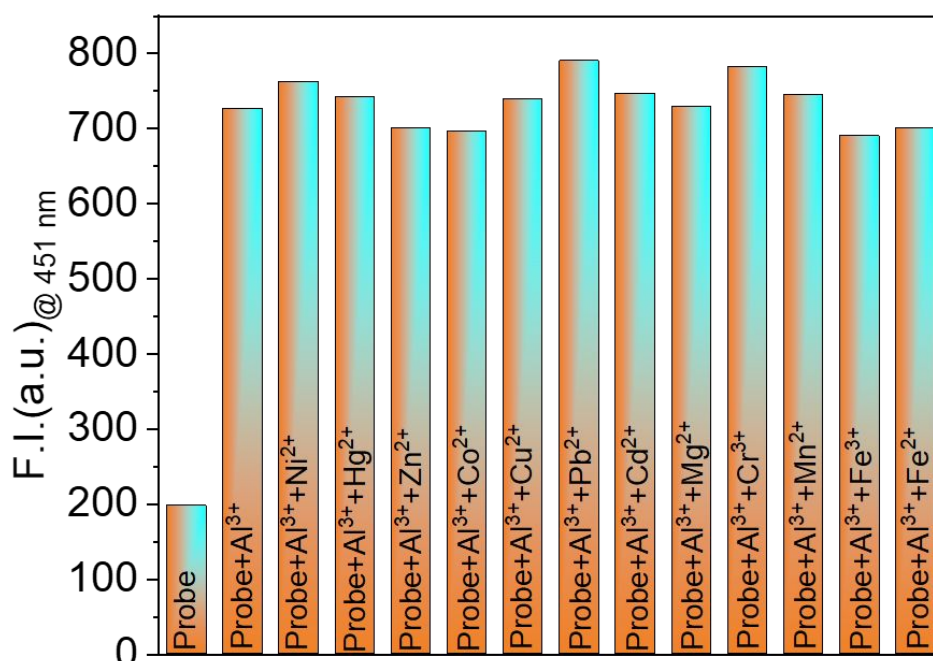

**Fig. S13.** Bar graph shows Al<sup>3+</sup> ion detection in the presence of various interfering metal ions.

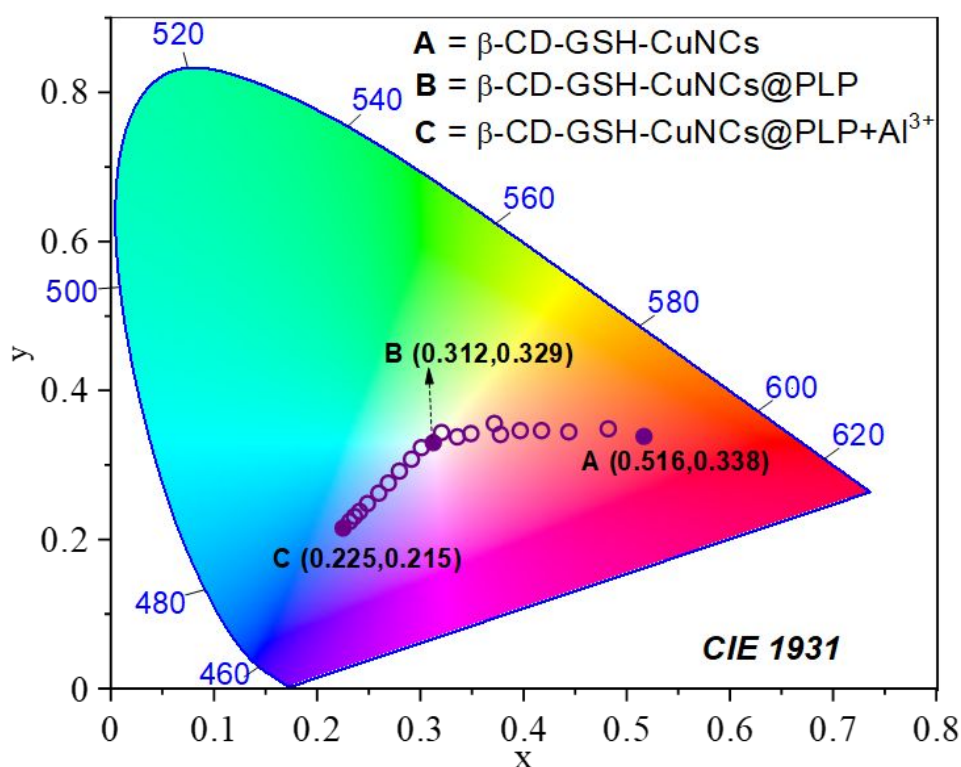

**Fig. S14.** CIE 1931 chromaticity diagram showing point (A) the colour coordinates of  $\beta$ -CD-GSH-CuNCs, point (B) the colour coordinates when the PLP concentration was  $2 \times 10^{-4}$  M, and point (C) the colour coordinates when the Al<sup>3+</sup> ( $2.4 \times 10^{-6}$  M) was added to *in situ* generated  $\beta$ -CD-GSH-CuNCs@PLP.

**Table S1.** Comparison with other recently published nanosensors for the detection of Al<sup>3+</sup> ions.

| <b>Fluorescent nanosensors</b>                                           | <b>Medium</b>         | <b>LOD (μM)</b> | <b>Ref.</b>      |
|--------------------------------------------------------------------------|-----------------------|-----------------|------------------|
| Mercaptosuccinic acid stabilized AgAu alloy nanoclusters (MSA–AgAu NCs)  | H <sub>2</sub> O      | 0.8             | 1                |
| Gallic acid-functionalized AgNPs                                         | H <sub>2</sub> O      | 0.92            | 2                |
| Xylenol orange functionalized gold nanoparticles (XO–AuNPs)              | H <sub>2</sub> O      | 0.04            | 3                |
| Cysteamine-capped copper nanoclusters(Cys–CuNCs)                         | acetic-acetate buffer | 26.7            | 4                |
| Pyridoxal derivative functionalized gold nanoparticles                   | H <sub>2</sub> O      | 0.51            | 5                |
| Dithiothreitol capped copper nanoclusters(DTT–CuNCs)                     | HAc–NaAc buffer       | 0.01            | 6                |
| glutathione (GSH)-capped Au NCs(GSH)-capped Au NCs)                      | acetate buffer        | 20              | 7                |
| Polyacrylate functionalized gold nanoparticles (PAA–AuNPs)               | H <sub>2</sub> O      | 2               | 8                |
| N-(2-hydroxynaphthylidene)-2-aminoethanethiol capped AuNPs (HNAET–AuNPs) | H <sub>2</sub> O      | 0.29            | 9                |
| Glutathione-silver nanoclusters (AgNCs)                                  | H <sub>2</sub> O      | 0.1             | 10               |
| <b>β-CD-GSH-CuNCs@PLP</b>                                                | <b>H<sub>2</sub>O</b> | <b>0.187</b>    | <b>Our study</b> |

## References

- (1) Zhou, T.-Y.; Lin, L.-P.; Rong, M.-C.; Jiang, Y.-Q.; Chen, X. Silver–Gold Alloy Nanoclusters as a Fluorescence-Enhanced Probe for Aluminum Ion Sensing. *Anal. Chem.* **2013**, *85* (20), 9839-9844.
- (2) Ghodake, G.; Shinde, S.; Kadam, A.; Saratale, R. G.; Saratale, G. D.; Syed, A.; Shair, O.; Alsaedi, M.; Kim, D.-Y. Gallic Acid-Functionalized Silver Nanoparticles as Colorimetric and Spectrophotometric Probe for Detection of Al<sup>3+</sup> in Aqueous Medium. *J. Ind. Eng. Chem.* **2020**, *82*, 243-253.
- (3) Garg, N.; Bera, S.; Ballal, A. Spr Responsive Xylenol Orange Functionalized Gold Nanoparticles-Optical Sensor for Estimation of Al<sup>3+</sup> in Water. *Spectrochim. Acta, Part A* **2020**, *228*, 117701.

- (4) Boonmee, C.; Promarak, V.; Tuntulani, T.; Ngeontae, W. Cysteamine-Capped Copper Nanoclusters as a Highly Selective Turn-on Fluorescent Assay for the Detection of Aluminum Ions. *Talanta* **2018**, *178*, 796-804.
- (5) Bothra, S.; Kumar, R.; Sahoo, S. K. Pyridoxal Derivative Functionalized Gold Nanoparticles for Colorimetric Determination of Zinc(II) and Aluminium(III). *RSC adv.* **2015**, *5*, 97690-97695.
- (6) Hu, X.; Mao, X.; Zhang, X.; Huang, Y. One-Step Synthesis of Orange Fluorescent Copper Nanoclusters for Sensitive and Selective Sensing of Al<sup>3+</sup> Ions in Food Samples. *Sensors Actuators B: Chem.* **2017**, *247*, 312-318.
- (7) Luo, P.; Zheng, Y.; Qin, Z.; Li, C.; Jiang, H.; Wang, X. Fluorescence Light up Detection of Aluminium Ion and Imaging in Live Cells Based on the Aggregation-Induced Emission Enhancement of Thiolated Gold Nanoclusters. *Talanta* **2019**, *204*, 548-554.
- (8) Kumar, A.; Bhatt, M.; Vyas, G.; Bhatt, S.; Paul, P. Sunlight Induced Preparation of Functionalized Gold Nanoparticles as Recyclable Colorimetric Dual Sensor for Aluminum and Fluoride in Water. *ACS Appl. Mater. Interfaces* **2017**, *9*, 17359-17368.
- (9) Huang, P.; Li, J.; Liu, X.; Wu, F. Colorimetric Determination of Aluminum(III) Based on the Aggregation of Schiff Base-Functionalized Gold Nanoparticles. *Microchim. Acta* **2016**, *183*, 863-869.
- (10) Liu, X.; Shao, C.; Chen, T.; He, Z.; Du, G. Stable Silver Nanoclusters with Aggregation-Induced Emission Enhancement for Detection of Aluminum Ion. *Sensors Actuators B: Chem.* **2019**, *278*, 181-189.

\*\*\*\*\*
